# Supplementary material for: The Economic Burden of Malnutrition in Pregnant Women and Children under 5 Years of Age in Cambodia
Source: Nutrients. 2016 May 14;8(5):292. doi: 10.3390/nu8050292 (PMC4882705; doi:10.3390/nu8050292)
Supplement: Supplementary file 1 [file nutrients-08-00292-s001.xls]

## Sheet: Econ
National Labor Part Rate	0.826	Cambodia Socio-Economic Survey 2014 LFS 2011: 84.4%
Male Labor Participation Rate	0.879	Cambodia Socio-Economic Survey 2014 LFS 2011: 88.8%
Female Labor Participation rate	0.775	Cambodia Socio-Economic Survey 2014 LFS 2011:80.4%
Working Population 15-65	8.76908e+06	Cambodia Socio-Economic Survey 2014
Life Expectancy	62.4	National Institute of Statistics, 2009 in DHS 2011
Life Expectancy, Male	60.5	National Institute of Statistics, 2009 in DHS 2012
Life Expectancy, Female	64.3	National Institute of Statistics, 2009 in DHS 2013
Work Force Entry	15
Women's Worklife	49.3
Male Worklife	45.5	59386.9
Work Life Average	47.4
GDP (current US$)	1.58374e+10	Ministry of Economy and Finance Projected 2013
GDP/Working Person	1806.05
Individual Wage/Labor Share	0.6
Wage Share	1083.63
Average Over-all Wage/Income	1252.89	From CAM BCR November 2013
Labor Force Survey Option	1252.89	LFS 2011 $177/month/HH @
Discount Rate	0.03

## Sheet: Health
Mortality Rates
Under 5 Mortality	35	DHS 2014					Rate
Child Mortality( 1-5 years)	7	DHS 2014				< 1	18
Infant Mortality/1000	28	DHS 2014				1-11m	10
Neonatal < 1 month	18	DHS 2014				Infant	28
Mortality Rate 1-12 months	10	DHS 2014				12-59m	7
Deaths						< 5y	35
Under 5 Mortality	13766.8
Infant Mortality/1000	11013.4
Child - 1 -5 years	2753.35
Neonatal < 1 month	7080.05
Post NeoNatal (1-11 months)	3933.36
1-5 months (60% Post Neonatal)	2360.02
6-11 Months (40% Post NeoNatal)	1573.34			2753.35	9440.06
6-24 months (6-11 Plus 1/3rd 6-59m)	2491.13				0.685714
Deaths 6-59 months	4326.7	U5 minus Neonatal minus 1-5 months (50% pos neonatal)
Proportion Mortality from Disease
	0-27 days	1-59 months	0-4 years
Diarrhea	0.03	14.1	7.6
ARI	3.8	28	16.7
Measles	0	3.6	1.9
		Supplement to: Black RE, Victora CG, Walker SP, and the Maternal and Child Nutrition
		Study Group. Maternal and child undernutrition and overweight in low-income
		and middle-income countries. Lancet 2013

## Sheet: Demo
Demographics		Census Projection
Total Population	1.519e+07	HIS, 2013 downloaded 2013
Population > 15-64yrs	1.06163e+07	HIS, 2013
Males > 15-64y	5.10839e+06	HIS, 2013
Females > 15-64y	5.50793e+06	HIS, 2013
Children < 15 years	4.57372e+06	HIS, 2013
Children < 5 Years	1.60863e+06	HIS, 2013
Children 6-59 months	1.42786e+06	HIS, 2013
Birth Rate	25.6	HIS, 2013
Annual Live Births	393336	HIS 2014
Population Growth	0.0152	http://www.nis.gov.kh/index.php/pop-demog-stat/censuses/census2008/provisional-population-totals
Children 1-5 months

## Sheet: Sum 
Summary Economic Consequences for All Indicators (Adjusted for Multiple Risks)
	Lost Workforce	Lost Future Productivity	Lost Current Productivity	Current Healthcare Costs	Total
	000,000/yr	000,000/yr	000,000/yr	000,000/yr	000,000/yr	%
Maternal Nutrition/LBW	12.8884	0.985348		0.821733	14.6955	0.0551543
Suboptimal Breastfeeding	20.6889			1.54435	22.2333	0.0834446
Wasting	7.36478				7.36478	0.027641		Mother's Nutrition & Behavior	36.9288
Stunting		120.261			120.261	0.451355		Underweight and Small Stature	139.92
Underweight	12.2942				12.2942	0.0461419		Vitamin & Mineral Deficiencies	89.5954
IDD		56.9735			56.9735	0.213829		Total	266.444
Zinc Deficiency	8.14891			7.14536	15.2943	0.0574015
Vitamin A Def	1.30276				1.30276	0.00488943
Child IDA		7.67556			7.67556	0.0288074
IDA in Adults			8.34922		8.34922	0.0313358
Annual Total	62.6881	185.895	8.34922	9.51145	266.444	1		Mothers Nutrition Status: Low Height, Low Body Mass Index, Anemia, Folic Acid Deficiency	920.682
	0.235277	0.69769	0.0313358	0.0356978	% of GDP	0.0168237		Non-Exclusive Breastfeeding < 6 months and Non Continued Breastfeeding 6-24 months	1498.48
								Low Weight for Height and/or Age (WAZ, WHZ)	1373.93
Total Estimated Attributable Deaths								Vitamin A & Zinc Deficiencies	660.558
	Individual Analysis		Adjusted Multiple Risks					Total Projected Annual Mortality	4453.65
	# Deaths	% Risk Group/Age	# Deaths	% Risk Group/Age
Neonatal
Mothers Nutrition Status	329.008	0.0464698	307.325	0.0434072
MOther's FAD NTD	577.732	0.0816	539.656	0.0762221
Sub Optimal Breast Feeding	563.825	0.0796357	526.666	0.0743873
	1470.56	0.207706	1373.65	0.194017		Mother Nutrition status	920.682
Infant: 1-5Month						EBF	1498.48
Mothers Nutrition Status	75.9329	0.0321747	73.7009	0.031229			1373.93
Sub Opt Breastfeeding	802.837	0.340183	779.238	0.330183			660.558
	878.77	0.372358	852.939	0.361412			4453.65
Infant 6-59 Months
Breastfeeding (6-24mnts)	244.708	0.0565576	192.58	0.0445098		1566.51
Wasting (WHZ)	654.03	0.151161	514.709	0.118961
Underweight (WAZ)	1091.79	0.252338	859.218	0.198585
VAD	115.692	0.0267391	91.0472	0.0210431
Zinc	723.665	0.167256	569.511	0.131627
	2829.89	0.654052	2227.07	0.514727
Total < 5 yrs	5179.22	0.376212	4453.65	0.323508
Adjustment for Multiple Risks	Total Deaths	Combined Hybrid PAR	Adjusted Attribution	Individual	Correction Factor: Adusted/Individual
Neonatl Deaths	7080.05	0.194017	1373.65	1470.56	0.934095
1-5 Month Deaths	2360.02	0.361412	852.939	878.77	0.970605
6-59 month Deaths	4326.7	0.514727	2227.07	2829.89	0.786981
		Hybrid Prevalence	Additive Prevalence
Stunting/Anemia/IDD Kids		0.453559	0.525		0.863923
Summary Key Nutrition Indicators
	Nutrition Indicator	Risk Group	National Prevalence	Cases or At Risk	Risk or Deficit	Economic Impact
Maternal Nutrition Deficits	Low BMI	Pregnant Women	0.14	55067	Infant and Maternal Mortality	Lost Workforce
	Low Height		0.054	21240.1
	Anemia		0.532	209255
	Folic Acid Deficiency		0.5	196668
Infant Care	Sub-Optimal Breastfeeding	Children< 24 mos	0.348	273762	Mortality & Morbidity	Lost Workforce & Health Care
Growth and Anthropometry	Wasting	Children < 5 yrs	0.096	137075
	Underweight		0.239	341260	Mortality	Lost Earnings & Health Care
	Stunting		0.324	462628	Growth & Development	Lost Workforce
Vitamin & Mineral Deficiency	Vitamin A Deficiency	Children < 5yrs	0.087	124224	Mortality	Future Productivity
	Zinc Deficiency		0.675	963808	Mortality & Morbidity	Lost Earnings & Health Care
	IDA		0.073	104234	Growth & Development	Work Performance & Productivity
		Adult Women	0.029	159730	Strength & Endurance
		Adult Men	0.010875	55553.7
				3.1045e+06
Nutrition Indicator								[1] Based on ratio of male to female anemia found in Vietnam survey
Low BMI	51.4378	55067	0.934095	51437.8
Low HAS	19.8403	21240.1	0.934095	19840.3
IDA	195.464	209255	0.934095	195464		3970
Folic Acid Deficiency	183.707	196668	0.934095	183707		0.16
Underweight	238.882	341260	0.7	238882
Sub-Optimal Breastfeeding	255.72	273762	0.934095	255720		0.72
Vitamin A Deficiency	97.7621	124224	0.786981	97762.1		1.38889
Stunting	323.84	462628	0.7	323840
Zinc Deficiency	758.499	963808	0.786981	758499
Anemia	82.0302	104234	0.786981	82030.2
	159.73	159730		159730
	55.5537	55553.7		55553.7
	2.42246	2.96743e+06		2.42246e+06

## Sheet: BF 0-1m
Suboptimal Breastfeeding in Neonatal Period								NEW NeoNatal Mortality
Estimated Mortality Rate < 1 month	7080.05							NEW BF Rates
	Diarrhea			ARI				NEW approach to BF Segments
Attributed Neotatal Deaths	0.03	212.401		0.141	998.287			NEW Mortality by Case Rates
	None	Partial	Predominant	None	Partial	Predomominant
Prevalence of Suboptimal BF	0.036	0.029	0.136	0.036	0.029	0.136
RR Mortality for Suboptimal BF	10.53	4.62	2.28	14.97	2.5	1.66
PAR Mortality	0.255443	0.0950062	0.148269	0.334629	0.0416866	0.0823668
Attributed Deaths	54.2564	20.1795	31.4926	334.055	41.6152	82.2256
Total Deaths	563.825
Over-all PAR	0.0796357
Loss of Productive Potential
Annual wage	1252.89
Effective employment rate	0.826
NPV owith average 15 years entry until entry into workforce	7.69303e+06	13644.4
	Breasfeeding from 2014 DHS
	None	Partial	Predominant	Exclusive
<1 m	3.6	2.9	13.6	79.9	100

## Sheet: BF 1-5m
Suboptimal Breastfeeding Months 1-5								NEW Post NeoNatal Mortality
Estimated Mortality Rate 1-5 months	2360.02							NEW BF Rates
	Diarrhea			0.28				NEW approach to BF Segments
Attributed Deaths	0.141	332.762		0.28	660.804			NEW Mortality by Case Rates
	None	Partial	Predomominant	None	Partial	Predomominant
Prevalence of Suboptimal BF	0.08	0.2235	0.111	0.08	0.2235	0.111
RR Mortality for Underweight	10.53	4.62	2.28	14.97	2.5	1.66
PAR Mortality	0.432592	0.44723	0.124405	0.527767	0.251077	0.0682593
Attributed Deaths	143.95	148.821	41.3972	348.751	165.913	45.1061	0
Raw Mortalty	334.169			559.77
Adjustment for Multi Risk	0.725373			0.670475				Breasfeeding fromDHS 2014
Adjusted Deaths	802.837							None	Partial	Predominant	Exclusive
Over-all PAR	0.340183							8	22.35	11.1	59	100.45
Loss of Productive Potential
Annual wage	1252.89
Effective employment rate	0.826
NPV owith average 15 years entry until entry into workforce	1.09542e+07	13644.4
				WHO 2.13

## Sheet: BF 6-24m
Cause Specific Approach
6-24 Month Mortality	2491.13
	ARI	Diarrhea			NEW Post NeoNatal Mortality
Proportional Mortality	0.28	0.141			NEW BF Rates
Attributed Deaths	697.516	351.249			NEW approach to BF Segments
Non Continued Breastfeeding	0.311	0.311			NEW Mortality by Case Rates
RR of Mortality Case	1.92	2.1
PAR Mortalty from Zinc	0.222468	0.254899
Mortality	155.175	89.533			DHS 2014 Non Continued BF Calc
Total Mortality	244.708					Months	Not BF
Over-all PAR	0.0982317				6-9m	3	7.2	21.6
Loss of Productive Potential					9-11 m	3	11.4	34.2
Annual wage	1252.89				12-23m	12	42	504
Effective employment rate	0.826							559.8
NPV owith average 14 years entry until entry into workforce	3.50143e+06					Weighted Average		31.1

## Sheet: NTD 
Burden of Neural Tube Defects (Spina Bifada & Anencephaly)		New Birthrate
Health Background Data		New Rate Estimate
Global Average Annual NTD Rate/1000	2.55	Annie Lo,1 Dora Polšek,2 and Simrita Sidhu1
Projected NTDS	1003.01	Estimating the burden of neural tube defects in low– and middle–income countries
Folic Acid Related @ 72%*	722.165	J Glob Health. 2014 Jun; 4(1): 010402.
Fatality Rate	0.8	doi: 10.7189/jogh.04.010402
Total Projected Deaths from NTDs	577.732	estimates based on all pregnancies resulting in live births, still births and terminations were 2.55/1000 (IQR = 1.56–3.91) for total NTD burden, 1.04/1000 (IQR = 0.67–2.48) for spina bifida, 1.03/1000 (IQR = 0.67–1.60) for anencephaly and 0.21 (IQR = 0.16–0.28) for encephalocele.
Proportion Neonatal Mortality	0.0816
Number Disabled	115.546
Severe	28.8866
Moderate	86.6598
Lost Productivity from Mortality
Economic Productivity Loss Projections
Average Annual Wage All Sectors	1252.89
Employed (all sexes)	0.826
Mortality: NPV with average 15 years entry until entry into workforce	7.88279e+06
Lost productivity Severe Disability	394139
Lost productivity Moderate Disability	591209
Health Care Costs
Born in Facility	0.831
	600.119
Average Pediatric Discharge	86
	51610.2

## Sheet: Mat-Neo LBW
Indicators of Maternal Nutrition Status
Child Deaths Attributed to Low Birth Weight				NEW LBW
Births	393336			NEW Prevalences
LBW % Prevalence	0.079	DHS 2014
LBW Cases	31073.5	Calculated
Est 2000-2500 Grams	27451.7	Calculated from Black et al
Est < 2000 grams	3621.89	Calculated from Black et al
Est 2000-2500 Grams as % of all Births	0.0697919	Calculated
Est < 2000 grams	0.00920814	Calculated
Total Number of Neonatal Deaths	7080.05
CoEfficient for Loss	Prevalence	RR	PAR	Attributed Deaths
Est 2000-2500 Grams based on Black Below	0.0697919	2.8	0.111605	790.168
Est < 2000 grams	0.00920814	8.1	0.0613658	434.473
Total Attributed LBW Mortality Per Year	1224.64
LBW Related Maternal Nutrition Factors
LBW Attributed to Mothers Low BMI
RR LBW BMI < 18.5	1.71	Black, Low BMI Term SGA
Prevalence of Low BMI	0.14	DHS 2014
PAR Chances of Mortality	0.090413		0.268657
LBW Mortality Attributed to Mothers Low BMI	110.723
LBW Mortality Attributed to Mothers Stunting
RR HAZ < 145 cm	2.2	Black, Low HAZ Term SGA
Prevalence of Low HAZ	0.054	DHS 2014
PAR Chances of Mortality	0.0608565
LBW Mortality Attributed to Mothers Low HAZ	74.5274
LBW Mortality Attributed to Mothers Anemia
Anemia	1.25	In Black, via Dibley
Prevalence of Anemia	0.532	DHS 2014
PAR Chances of Mortality	0.117387
LBW Mortality Attributed to Mothers Anemia	143.758
Prematurity from Calcium/Vitamin D Deficiency (NOT USED)
RR Preterm Birth	1.31579	In Black, Cochrane review by Hofmeyr
Prevalence Moderate-Severe Calcium Deficiency	0.14	From Vietnam NNS
PAR Preterm from Calcium Deficiency	0.0423387
Preterm Mortality Attributed to Mother's Calcium Deficiency
Total Attribued Mortality	329.008
Proportion Neonatal Deaths	0.0464698
Loss of Productive Potential
Annual wage	1252.89
Effective employment rate	0.826
NPV with average 15 years entry until entry into workforce	4.48911e+06	13644.4
Global LBW Analysis: Lancet,Black et al 2008
	Global Analysis	Calculated Proportion Total
2000-2499 g	0.0955	0.883441
1500-1990g	0.0126	0.116559
Total	0.1081	1

## Sheet: Mat-Neo 6-59
Child Deaths Attributed to Low Birth Weight
Births	393336
LBW %	0.079	DHS 2014
LBW Cases less neonatal lbw deaths	30744.5	Calculated
Post Neonatal Deaths less LBW Neonatal Deaths	3933.36
CoEfficient for Loss	Prevalence	RR	PAR
Risk of Mortality from SGA (Assume Equiv to LBW)	0.079	1.98	0.0718568
Total Attributed Post Neonatal deaths	282.639
Nutrition Related
LBW Related Nutrition Factors
LBW Mortality Attributed to Mothers Low BMI
RR LBW BMI < 18.5	1.71	Black, Low BMI Term SGA
Prevalence of Low BMI	0.14	DHS 2014
PAR Chances of Mortality	0.090413
LBW Mortality Attributed to Mothers Low BMI	25.5542
LBW Mortality Attributed to Mothers Stunting
RR LBW HAZ < 145 cm	2.2	Black, Low HAZ Term SGA
Prevalence of Low HAZ	0.054	DHS 2014
PAR Chances of Mortality	0.0608565
LBW Mortality Attributed to Mothers Low HAZ	17.2004
LBW Mortality Attributed to Mothers Anemia
Anemia	1.25	In Black, via Dibley
Prevalence of Anemia	0.532	DHS 2014
PAR Chances of Mortality	0.117387
LBW Mortality Attributed to Mothers Anemia	33.1783
Total Attributed Mortality	75.9329
Proportion Post Neonatal Deaths	0.0193048
Loss of Productive Potential
Annual wage	1252.89
Effective employment rate	0.826
NPV with average 15 years entry until entry into workforce	1.03606e+06	13644.4

[truncated: 15 more sheets: WHZ 6-59, WAZ 6-59, Zinc 6-59, VAD6-59, Sheet5, HCCOST, BFMorb0-6, BFMorb6-24, ZincMorb, LBWMorb, Stunt, IDD, IDA kids, IDA Adults, Mat Mort]
